# Supplementary material for: Predictive factors of relapse after dose reduction of oral 5-aminosalicylic acid in patients with ulcerative colitis in the remission phase
Source: PLoS One. 2021 Aug 4;16(8):e0255620. doi: 10.1371/journal.pone.0255620 (PMC8336875; doi:10.1371/journal.pone.0255620)
Supplement: S1 Appendix — (XLSX) [file pone.0255620.s001.xlsx]

## Sheet: S1 Appendix
ASUC 0:(-), 1:(+)	relapse at 52 weeks 0:(-), 1:(+)	Relapse during the overall observation period 0:(-), 1:(+)	Date of reinduction therapy	Reinduction therapy	Date of Colonoscopy	Date of reduction of oral 5-ASA	Alb g/dl	WBC 10^3/μl	Hb g/dl	Plt 10^3/μl	CRP mg/dl 0:<0.3 1:≧0.3	CRP mg/dl	p-mayo	MES	Age at diagnosis (years)	Age at reduction (years)	During the disease (years)	Duration of disease remission, years 0:<2y 1:≧2y	Duration of disease remission, years	Type of Oral 5-ASA 1：Pentasa 2：Asacol	Dose of oral 5-ASA before reduction.（㎎/day）	Dose of oral 5-ASA after reduction.（㎎/day）	The period of remission after reduction	Date of last visit	Observation period (days)	Observation period (weeks)	gender ０: Male １: Female	Location of disease 1: pancolitis 2: left-side colitis 3: proctitis	Corticoseteroids use 0: (-), 1: (+)	The cumulative dose of corticosteroids. (mg)	Thiopurines 0: (-), 1: (+)
1	1	1	2013-05-16	oral PSL	2012-06-15	2012-06-30	4.8	4.5	14.4	240	0	0	0	0	26	28	2	0	0	1	4000	2000	320	2017-12-02	320	46	0	2	1	3850	0
1	1	1	2017-03-02	a high dose of oral 9-ASA and topical therapy	2016-04-28	2016-06-09	3.9	6	12.6	190	0	0	1	2	66	66	0	0	0	2	3600	2400	266	2018-03-29	266	38	0	2	1	1610	0
1	1	1	2016-07-14	a high dose of oral 10-ASA	2015-12-15	2016-02-04	4.6	14.2	15.3	319	0	0	0	1	21	23	2	0	0	2	3600	2400	161	2018-05-02	161	23	0	2	1	2380	0
1	1	1	2016-03-09	a high dose of oral 11-ASA	2014-03-27	2015-12-02	-	4.7	14	204	0	0.08	0	1	49	60	11	1	2	2	3600	2400	98	2018-03-28	98	14	1	2	1	1680	1
1	1	1	2013-04-24	a high dose of oral 5-ASA and topical therapy	2012-05-30	2012-09-05	4.5	5.6	13.9	182	0	0	0	0	31	59	28	1	7	1	3000	2000	231	2018-05-09	231	33	1	1	1	2590	1
1	1	1	2013-07-28	a high dose of oral 10-ASA and topical therapy	2013-06-24	2013-06-24	4	9.3	8.9	276	0	0	0	0	64	76	12	0	0	2	3600	2400	34	2018-03-12	34	5	0	1	1	2520	0
1	1	1	2015-09-24	a high dose of oral 6-ASA	2015-03-19	2015-04-09	4.3	6.4	16.4	147	0	0	0	0	45	65	20	0	1	1	3000	2000	168	2018-04-19	168	24	0	1	1	2520	0
0	1	1	2012-09-26	a high dose of oral 14-ASA	2011-06-27	2012-03-14	4.1	5.6	11.7	194	0	0	0	1	55	66	11	0	1	1	4000	2000	196	2017-12-28	196	28	1	2	1	3255	0
0	0	0			2015-05-13	2015-11-30	4.2	5.2	13.6	251	0	0.02	0	1	23	37	14	1	2	2	3600	2400	#NUM!	2018-04-26	878	125	1	3	1		0
0	0	0			2010-07-13	2012-11-13	4	6.8	13.1	284	1	0.5	0	1	33	64	31	1	5	1	3000	2000	#NUM!	2014-02-10	454	65	1	3	1	2800	0
0	0	0			2012-08-28	2012-09-10	5.2	7.4	16.5	260	0	0	0	1	27	32	5	0	0	2	3600	2400	#NUM!	2018-03-14	2011	287	0	1	1	3290	0
0	0	1	2015-09-04		2012-08-27	2012-11-15	4.2	4.5	12.7	225	0	0	0	-	76	76	0	0	0	2	3600	2400	1023	2017-10-17	1023	146	1	2	1	1120	0
0	0	0			-	2015-10-08	4.1	4.3	15.1	199	0	0	0	当院検査なし	43	45	2	0	1	2	3600	2400	#NUM!	2018-03-22	896	128	0	1	1		0
1	0	1	2017-10-26		2013-10-23	2013-11-06	4	4.3	13.2	168	0	0	0	0	20	35	15	1	3	1	3000	2000	1450	2018-03-01	1450	207	0	1	1	3360	1
1	0	0			2012-06-18	2013-01-21		4	12.8	151	0	0	0	2	56	68	12	0	0	1	3000	2000	#NUM!	2018-03-13	1877	268	0	1	1	4970	0
0	0	1	2017-12-13		2012-01-18	2012-11-07	4.4	7	11.4	553	0	0	0	0	49	50	1	0	0	1	3000	2000	1862	2018-04-11	1862	266	1	2	1	2345	0
0	1	1	2017-08-17	a high dose of oral 7-ASA and topical therapy	2016-09-08	2016-09-15	4.5	9.7	15.1	354	0	0	0	1	41	45	4	0	1	2	3600	2400	336	2018-04-24	336	48	0	1	0		0
0	1	1	2016-03-30	a high dose of oral 8-ASA and topical therapy	2015-02-01	2015-07-04	-	7.6	15.1	245	0	0.1	0	2(another hospital)	20	20	0	0	0	2	3600	2400	270	2018-02-15	270	39	0	3	0		0
0	1	1	2014-04-19	a high dose of oral 5-ASA	2013-07-16	2013-08-03	4.9	10.5	13.7	198	0	0	0	0	26	32	6	1	2	1	3000	2000	259	2016-08-25	259	37	1	1	0		0
0	1	1	2012-12-10	a high dose of oral 7-ASA	2012-07-09	2012-09-04	4.3	5.4	12.6	161	0	0	0	0	38	43	5	1	4	1	3000	2000	97	2013-06-24	97	14	1	1	0		0
0	1	1	2014-12-09	a high dose of oral 9-ASA	2013-04-19	2014-01-21	4.9	5.4	16	291	0	0	0	1	40	43	3	1	3	1	3000	2000	322	2018-04-24	322	46	0	3	0		0
0	1	1	2013-02-05	a high dose of oral 15-ASA	2011-06-13	2012-05-08	5	5.3	16.7	196	0	0	0	0	23	29	6	1	6	1	4000	2000	273	2018-03-26	273	39	0	1	0		0
0	1	1	2014-01-30	a high dose of oral 12-ASA	2011-07-21	2013-11-28	4.5	4.8	15.3	237	0	0	0	1	31	47	16	0	0	2	3600	2400	63	2017-08-31	63	9	0	3	0		0
0	1	1	2015-05-27	a high dose of oral 6-ASA and topical therapy	2012-06-07	2014-08-13	4.7	4.5	12.6	344	0	0	0	1	28	39	11	0	1	1	3000	2000	287	2018-03-14	287	41	1	3	0		0
0	1	1	2013-06-01	a high dose of oral 8-ASA	2012-05-21	2012-09-01	4	9.4	15	229	1	0.7	0	0	29	39	10	1	9	1	3000	2000	273	2018-03-03	273	39	0	1	0		0
0	1	1	2012-11-01	a high dose of oral 13-ASA	2012-07-30	2012-08-16	4.6	4.7	14.6	191			0	1	47	52	5	0	0	1	4000	2000	77	2018-04-12	77	11	0	3	0		0
0	0	0			2013-07-19	2014-12-04	4.6	5.6	16	221	0	0	0	1	31	34	3	0	0	1	4000	2000	#NUM!	2018-04-12	1225	175	0	3	0		0
0	0	0			2015-11-30	2015-12-15	4.5	6.8	15.7	198	0	0	0	0	31	47	16	0	0	2	3600	2400	#NUM!	2017-12-11	727	104	0	3	0		0
0	0	0			2012-10-02	2012-10-20	4.1	4.1	13.1	198	0	0	0	0	35	36	1	0	0	2	3600	2400	#NUM!	2018-04-11	1999	286	0	2	0		0
0	0	0			2013-07-05	2013-08-08	4.5	5.8	14.6	149	0	0	1	0	53	55	2	0	1	2	3600	2400	#NUM!	2018-03-15	1680	240	0	3	0		0
0	0	0			2014-10-03	2014-11-19	4.7	5.5	13.7	259	0	0	0	1	26	26	0	0	0	2	3600	2400	#NUM!	2016-06-08	567	81	0	2	0		0
0	0	0			2013-10-23	2014-02-12	3.8	5	9.7	298	0	0	0	1	23	24	1	0	0	2	3600	2400	#NUM!	2018-04-16	1524	218	1	1	0		0
0	0	1	2014-10-23		2012-12-27	2013-06-27	4	11.3	14.8	269	0	0	0	1	27	30	3	0	1	2	3600	2400	483	2018-03-28	483	69	1	3	0		0
0	0	0			2013-05-15	2014-02-05	4.2	5.5	13	167	0	0	0	1	45	46	1	0	0	2	3600	2400	#NUM!	2018-02-21	1477	211	0	2	0		0
0	0	1	2017-11-28		2015-07-06	2016-06-06	4.6	6.9	12.7	365	0	0	0	1	25	31	6	1	3	2	3600	2400	540	2017-12-26	540	77	1	2	0		0
0	0	0			2014-05-09	2015-07-06		5.9	13.2	244	0	0.17	0	2	22	24	2	1	2	2	3600	2400	#NUM!	2018-03-12	980	140	1	3	0		0
0	0	1	2017-09-27		2012-05-16	2015-09-16	4.3	4.2	13.2	272	0	0	0	1	20	33	13	1	2	2	3600	2400	742	2018-04-18	742	106	1	3	0		0
0	0	0			2010-06-04	2016-01-16	4.5	5.9	15	309	0	0	1	1	29	35	6	0	0	2	3600	2400	#NUM!	2017-10-19	642	92	0	3	0		0
0	0	0			2014-05-27	2014-06-07	4.1	4.2	14.4	211	0	0.03	0	0	41	44	3	0	1	1	3000	2000	#NUM!	2016-12-17	924	132	1	3	0		0
0	0	0			2012-06-14	2012-06-27	4.4	7.2	13.7	254	0	0	0	0	50	51	1	0	0	1	3000	2000	#NUM!	2018-03-13	2085	298	1	1	0		0
0	0	0			2014-10-03	2014-10-18	3.7	4.8	15.4	199	0	0	0	0	59	68	9	0	0	1	3000	2000	#NUM!	2018-05-10	1300	186	0	1	0		0
0	0	1	2016-03-05		2014-07-11	2014-08-02	4.8	4	13.9	181	0	0	0	1	39	40	1	0	1	1	3000	2000	581	2018-04-07	581	83	0	2	0		0
0	0	0			2016-09-23	2016-10-20	-	4.9	12.8	268	0	0.06	1	1	26	32	6	0	0	1	3000	2000	#NUM!	2018-03-08	504	72	0	1	0		0
0	0	0			2012-07-05	2012-08-04	4.8	4.4	13.8	234	0	0	0	0	40	45	5	1	4	1	3000	2000	#NUM!	2018-03-17	2051	293	0	3	0		0
0	0	0			2015-08-18	2015-10-01	-	-	-	-		-	0	0	30	30	0	0	0	1	3000	2000	#NUM!	2017-11-30	791	113	0	1	0		0
0	0	0			2013-07-09	2013-11-26		5.1	15.1	169	0	0	0	0	58	61	3	0	1	1	3000	2000	#NUM!	2018-04-10	1596	228	0	1	0		0
0	0	0			2016-06-06	2016-12-05	4.4	5.8	14	207	0	0	0	1	45	51	6	0	1	1	3000	2000	#NUM!	2018-04-02	483	69	0	2	0		0
0	0	0			2012-07-02	2013-04-22	4.5	3.7	14.2	157	0	0	0	2	69	73	4	1	2	1	3000	2000	#NUM!	2018-04-16	1820	260	0	2	0		0
0	0	0			2010-12-20	2012-02-06	-	8.5	13.5	305	0	0	0	2	31	32	1	0	0	1	3000	2000	#NUM!	2013-05-27	476	68	1	2	0		0
0	0	1	2016-04-14		2009-01-22	2012-05-24		7.6	14.4	180	0	0	0	1	43	46	3	1	2	1	3000	2000	1421	2018-04-12	1421	203	0	1	0		0
0	0	0			2012-05-09	2016-03-07		6.1	15.1	225	0	0	0	0	47	57	10	1	4	1	3000	2000	#NUM!	2018-04-23	777	111	0	3	0		0
0	0	1	2015-08-06		2008-09-11	2012-12-11	4.6	7	11.6	225	0	0	0	1	33	39	6	1	6	1	3000	2000	968	2018-03-08	968	138	1	2	0		0
0	0	1	2018-01-11			2013-08-01							0		34	59	25	0	1	1	3000	2000	1624	2018-03-08	1624	232	0	1	0		0
0	0	0			2012-09-13	2013-12-12	4.7	4	14.6	216	0	0	0	2	31	32	1	0	1	1	4000	2000	#NUM!	2018-03-13	1552	222	0	3	0		0
0	0	1	2014-09-05		2010-07-28	2012-12-25	4.5	4.7	14.3	115	0	0	0	0	39	44	5	0	0	1	4000	2000	619	2018-03-13	619	88	0	3	0		0
0	0	0			2017-07-18	2017-08-03	4.7	7.7	16.1	341	0	0	0	1	33	34	1	0	1	2	3600	2400	#NUM!	2018-12-20	504	72	0	2	0		0
0	0	0			2015-08-06	2015-08-24		6.3	16	210			0	1	78	81	3	1	2	2	3600	2400	#NUM!	2018-05-14	994	142	1	1	0		0
0	0	0			2012-08-28	2012-09-18	4.5	6.5	11.5	362	0	0	0	1	32	66	34	1	3	2	3600	2400	#NUM!	2018-04-14	2034	291	1	3	0		0
0	0	0			2015-12-01	2017-11-08		6.4	12.6	258	0	0.12	0	1	34	35	1	0	1	2	3600	2400	#NUM!	2019-02-07	456	65	1	3	0		0
0	0	1	2017-11-30		2013-05-14	2015-05-28	4.2	3.7	14.1	237	0	0	1	1	35	51	16	1	10	2	3600	2400	917	2018-03-29	917	131	0	3	0		0
0	0	0			2012-07-23	2012-08-07	4.2	5.3	12.6	320	0	0	0	1	26	27	1	0	0	1	3000	2000	#NUM!	2018-03-12	2043	292	1	3	0		0
0	0	1	2015-12-24		2013-08-15	2013-09-03	3.9	9.6	14	155	0	0	0	1	52	69	17	0	1	1	3000	2000	842	2018-04-19	842	120	1	2	0		0
0	0	0			2012-08-13	2012-11-15	5.1	6.9	15.1	232	0	0	0	1	36	39	3	1	2	1	3000	2000	#NUM!	2018-03-08	1939	277	0	1	0		0
0	0	0			2012-07-18	2012-12-17	4.6	6.4	11.9	250	0	0	0	1	31	39	8	1	2	1	3000	2000	#NUM!	2014-02-20	430	61	1	1	0		0
0	0	0			2015-12-10	2017-01-19	4	9	15.2	174	1	0.33	0	0	28	65	37	0	1	1	3000	2000	#NUM!	2018-03-15	420	60	0	3	0		0
0	0	0			2014-05-21	2016-02-03	3.9	6.8	12.6	336	1	0.3	0	1	47	58	11	0	0	1	3000	2000	#NUM!	2018-03-07	763	109	1	3	0		0
0	0	0			2012-02-07	2014-02-27	4.7	5	15.7	151			0	0	17	21	4	1	3	1	3000	2000	#NUM!	2015-09-07	557	80	0	3	0		0
0	0	0			2010-09-02	2013-09-12	4.1	5.5	12.3	288	1	0.5	0	2	39	42	3	1	2	1	3000	2000	#NUM!	2018-03-22	1652	236	1	3	0		0
0	0	0			2016-08-08	2016-08-25	4.2	4.9	14.5	166	0	0.04	0	1	71	71	0	0	0	1	4000	2000	#NUM!	2018-03-15	567	81	0	2	0		0
0	0	0			2013-05-14	2013-08-28	4.2	6.4	14.7	186	0	0	0	1	74	74	0	0	0	1	4000	2000	#NUM!	2018-04-16	1692	242	0	3	0		0
